# Supplementary material
Source: PubMed Central journal article supplement (PMC10659122)

## SUPPLEMENT

**eTable 1.** Drug overdose death rates by state, 2017.

| Rank | State          | Drug overdose death rate<br>(per 100,000 population) | Tertile |
|------|----------------|------------------------------------------------------|---------|
| 1    | Nebraska       | 8.1                                                  | First   |
| 2    | South Dakota   | 8.5                                                  | First   |
| 3    | North Dakota   | 9.2                                                  | First   |
| 4    | Texas          | 10.5                                                 | First   |
| 5    | Iowa           | 11.5                                                 | First   |
| 6    | California     | 11.7                                                 | First   |
| 7    | Montana        | 11.7                                                 | First   |
| 8    | Kansas         | 11.8                                                 | First   |
| 9    | Mississippi    | 12.2                                                 | First   |
| 10   | Wyoming        | 12.2                                                 | First   |
| 11   | Oregon         | 12.4                                                 | First   |
| 12   | Minnesota      | 13.3                                                 | First   |
| 13   | Hawaii         | 13.8                                                 | First   |
| 14   | Idaho          | 14.4                                                 | First   |
| 15   | Georgia        | 14.7                                                 | First   |
| 16   | Washington     | 15.2                                                 | First   |
| 17   | Arkansas       | 15.5                                                 | First   |
| 18   | Colorado       | 17.6                                                 | Second  |
| 19   | Virginia       | 17.9                                                 | Second  |
| 20   | Alabama        | 18.0                                                 | Second  |
| 21   | New York       | 19.4                                                 | Second  |
| 22   | Oklahoma       | 20.1                                                 | Second  |
| 23   | Alaska         | 20.2                                                 | Second  |
| 24   | South Carolina | 20.5                                                 | Second  |
| 25   | Wisconsin      | 21.2                                                 | Second  |
| 26   | Illinois       | 21.6                                                 | Second  |
| 27   | Nevada         | 21.6                                                 | Second  |
| 28   | Arizona        | 22.2                                                 | Second  |
| 29   | Utah           | 22.3                                                 | Second  |
| 30   | Vermont        | 23.2                                                 | Second  |
| 31   | Missouri       | 23.4                                                 | Second  |
| 32   | North Carolina | 24.1                                                 | Second  |
| 33   | Louisiana      | 24.5                                                 | Second  |
| 34   | New Mexico     | 24.8                                                 | Second  |
| 35   | Florida        | 25.1                                                 | Second  |
| 36   | Tennessee      | 26.6                                                 | Third   |
| 37   | Michigan       | 27.8                                                 | Third   |

|    |               |      |       |
|----|---------------|------|-------|
| 38 | Indiana       | 29.4 | Third |
| 39 | New Jersey    | 30.0 | Third |
| 40 | Connecticut   | 30.9 | Third |
| 41 | Rhode Island  | 31.0 | Third |
| 42 | Massachusetts | 31.8 | Third |
| 43 | Maine         | 34.4 | Third |
| 44 | Maryland      | 36.3 | Third |
| 45 | Delaware      | 37.0 | Third |
| 46 | New Hampshire | 37.0 | Third |
| 47 | Kentucky      | 37.2 | Third |
| 48 | Pennsylvania  | 44.3 | Third |
| 49 | Ohio          | 46.3 | Third |
| 50 | West Virginia | 57.8 | Third |

One-third of participants were sampled from each tertile.

**eTable 2.** Characteristics of survey respondents and non-respondents.

|                                         | <b>Respondents<br/>n= 173</b> | <b>Non-respondents<br/>n= 648</b> | <b>p-value</b> |
|-----------------------------------------|-------------------------------|-----------------------------------|----------------|
| Age, mean (standard error)              | 51.9 (1.0)                    | 50.1 (0.5)                        | 0.14           |
| Female, %                               | 43.4                          | 41.8                              | 0.72           |
| State drug overdose death rate, 2017, % |                               |                                   | 0.35           |
| Tertile 1 (lowest)                      | 37.0                          | 32.6                              |                |
| Tertile 2                               | 28.9                          | 34.4                              |                |
| Tertile 3 (highest)                     | 34.1                          | 33.0                              |                |
| Primary care specialty, %               |                               |                                   | 0.16           |
| Internal medicine                       | 45.1                          | 51.9                              |                |
| Family medicine                         | 53.8                          | 46.0                              |                |
| General practice                        | 1.2                           | 2.2                               |                |

**eFigure 1.** Study flow diagram.

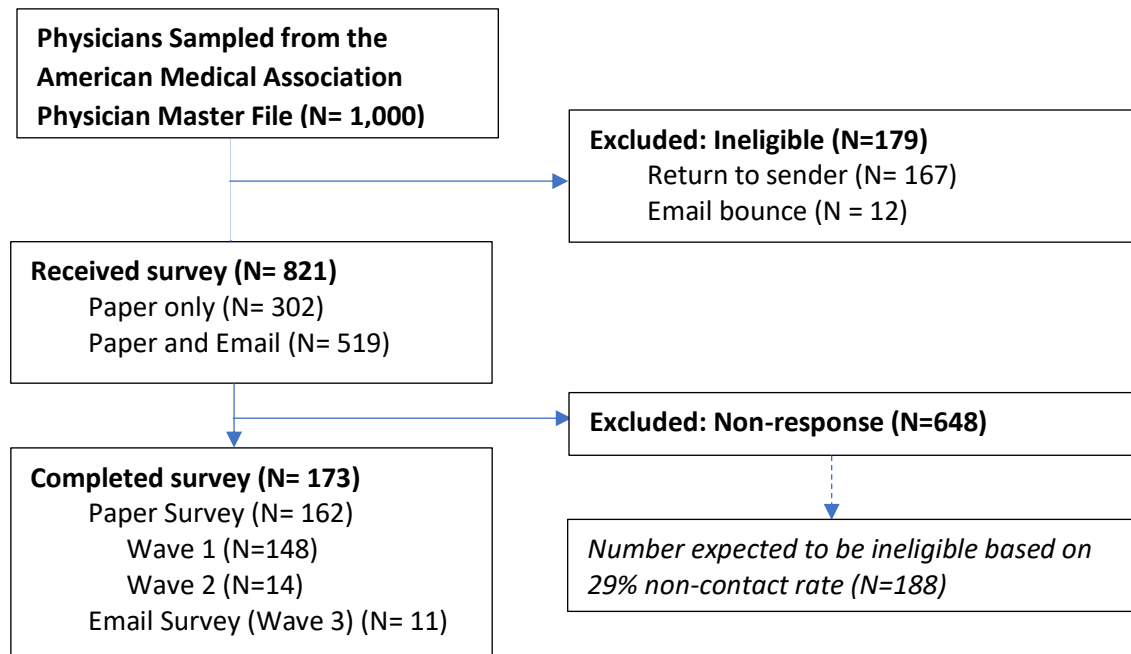

Supplement: NIHMS1912671-supplement-Supplement_2.pdf [file NIHMS1912671-supplement-Supplement_2.pdf]
